# Supplementary material for: Parastomal hernias after cystectomy and ileal conduit urinary diversion: surgical treatment and the use of prophylactic mesh: a systematic review
Source: PubMed Central journal article supplement (PMC8966280; doi:10.1186/s12893-022-01509-y), 2022-03-29
Supplement: 12893_2022_1509_MOESM2_ESM.pdf [file 12893_2022_1509_MOESM2_ESM.pdf]

# Surgical Treatment of Parastomal Hernias after Cystectomy and Ileal Conduit Urinary Diversion – A systematic review

*Hernia*, Dewulf M, Hildebrand ND, Bouwense SAW, Boucy ND, Muysoms F  
Maastricht UMC+, Maria Middelaers Gent  
Corresponding author: dewulfmaxime@gmail.com

## Appendix 2- Search strategy

### Search in detail:

#### PubMed

17.12.2020:

*((((abdominal hernia[MeSH Terms]) OR (hernia[MeSH Terms])) OR (hernia)) OR (abdominal hernia)) OR (parastomal hernia[MeSH Terms]) OR (parastomal hernia)) AND (((((((cystectomy[MeSH Terms]) OR (cystectomy)) OR (urinary diversion[MeSH Terms]) OR (urinary diversion)) OR (ileal conduit[MeSH Terms]) OR (ileal conduit))) OR (urostomy))*

The screenshot shows the PubMed Advanced Search Builder interface. The search query entered is: *((((abdominal hernia[MeSH Terms]) OR (hernia[MeSH Terms])) OR (hernia)) OR (abdominal hernia)) OR (parastomal hernia[MeSH Terms]) OR (parastomal hernia)) AND (((((((cystectomy[MeSH Terms]) OR (cystectomy)) OR (urinary diversion[MeSH Terms]) OR (urinary diversion)) OR (ileal conduit[MeSH Terms]) OR (ileal conduit))) OR (urostomy))*. The results table shows 367 results for search #6, with a time of 06:14:18.

| Search | Actions | Details | Query                                                                                                                                                                                                                                                                                                                                                  | Results | Time     |
|--------|---------|---------|--------------------------------------------------------------------------------------------------------------------------------------------------------------------------------------------------------------------------------------------------------------------------------------------------------------------------------------------------------|---------|----------|
| #6     | ...     | ▼       | Search: (((((((abdominal hernia[MeSH Terms]) OR (hernia[MeSH Terms])) OR (hernia)) OR (abdominal hernia)) OR (parastomal hernia[MeSH Terms]) OR (parastomal hernia)) AND (((((((cystectomy[MeSH Terms]) OR (cystectomy)) OR (urinary diversion[MeSH Terms]) OR (urinary diversion)) OR (ileal conduit[MeSH Terms]) OR (ileal conduit))) OR (urostomy)) | 367     | 06:14:18 |

*((((cystectomy) OR urinary diversion) OR ileal conduit) OR urostomy)) AND ((hernia) OR parastomal hernia)*

Advanced Search Results - PubMed x +

https://pubmed.ncbi.nlm.nih.gov/advanced/

National Library of Medicine  
National Center for Biotechnology Information

Log in

PubMed.gov  
User Guide

PubMed Advanced Search Builder

Add terms to the query box

All Fields Enter a search term ADD Show Index

Query box

Enter / edit your search query here Search

History and Search Details Download Delete

| Search | Actions | Details | Query                                                                                                              | Results | Time     |
|--------|---------|---------|--------------------------------------------------------------------------------------------------------------------|---------|----------|
| #1     | ...     | >       | Search: (((((cystectomy) OR urinary diversion) OR ileal conduit) OR urostomy)) AND ((hernia) OR parastomal hernia) | 367     | 08:02:07 |

Showing 1 to 1 of 1 entries

*Results: 367*

*Imported to Endnote: 367*

*After removal of duplicates: 356*

## Embase:

17.12.2020

((cystectomy or urinary diversion or ileal conduit or urostomy) and parastomal hernia).af.

The screenshot displays the Ovid search interface. At the top, the search bar contains the query: ((cystectomy or urinary diversion or ileal conduit or urostomy) and parastomal hernia).af. The search results section shows 234 results. The first result is highlighted in yellow and reads: "Parastomal hernia repair with onlay mesh remains a safe and effective approach." The authors are listed as De Robles M.S., Young C.J., and the journal is BMC surgery, 20 (1) (pp 296), 2020. The date of publication is 24 Nov 2020. The interface includes navigation options like "View By" (Text, Multimedia), "Search Information", and "Limits".

Results: 234

Updated to Endnote: 234

After removal duplicates: 128

## Web of Science:

17.12.2020

Web of Science

Search

Results: 250  
(from Web of Science Core Collection)

You searched for: ALL FIELDS:  
(cystectomy OR urinary diversion  
OR ileal conduit OR urostomy) AND  
ALL FIELDS: (hernia OR parastomal  
hernia).

Timespan: All years. Indexes: SCI-  
EXPANDED, SSCI, A&HCI, CPCI-S, CPCI-  
SSH, ESCL  
...Less

Create an alert

Refine Results

Search within results for...

Filter results by:

Open Access (55)

Refine

Sort by: Date JF Times Cited Usage Count Relevance More

Select Page Export to EndNote Desktop More Add to Marked List

Analyze Results  
Create Citation Report

1. Short-term outcomes of parastomal hernia prophylaxis with Stapled Mesh stoma Reinforcement Technique (SMART) in permanent stomas  
By: Chen, Michelle Zhiyun; Gilmore, Andrew  
ANZ JOURNAL OF SURGERY  
Early Access: NOV 2020  
Full Text? Full Text from Publisher View Abstract

Times Cited: 0  
(from Web of Science Core Collection)  
Usage Count

2. Strangulated Internal Hernia Beneath the Obturator Nerve After Laparoscopic Radical Cystectomy With Extended Pelvic Lymph Node Dissection  
By: Kanno, Toru; Otsuka, Kazuo; Takahashi, Toshifumi; et al.  
UROLOGY Volume: 145 Pages: 11-12 Published: NOV 2020  
Full Text? Full Text from Publisher View Abstract

Times Cited: 0  
(from Web of Science Core Collection)  
Usage Count

3. Preventing Parastomal Hernia After Ileal Conduit by the Use of a Prophylactic Mesh: A Randomised Study  
By: Liedberg, Fredrik; Kollberg, Petter; Allerbo, Marie; et al.  
EUROPEAN JOURNAL OF SURGERY Volume: 78 Issue: 6 Page: 757-763 Published: NOV 2020

Times Cited: 3  
(from Web of Science Core Collection)

Results: 250

Imported to Endnote: 250

After removal of duplicates: 58

*ALL FIELDS: (cystectomy OR urinary diversion OR ileal conduit OR urostomy) AND ALL FIELDS: (hernia OR parastomal hernia)*

## CENTRAL database:

18.12.2020

*(cystectomy OR urinary deviation OR ileal conduit OR urostomy) in Title Abstract Keyword AND parastomal hernia OR hernia in Title Abstract Keyword - (Word variations have been searched)*

The screenshot shows the Cochrane Central Register of Controlled Trials search interface. The search query is: **(cystectomy OR urinary deviation OR ileal conduit OR urostomy) in Title Abstract Keyword AND parastomal hernia OR hernia in Title Abstract Keyword - (Word variations have been searched)**. The results show 28 trials. A filter table on the left shows the distribution of trials by year first published: 2020 (2), 2019 (4), and 2018 (0). The search results are displayed in a table with columns for Cochrane Reviews (0), Cochrane Protocols (0), Trials (28), Editorials (0), Special Collections (0), and Clinical Answers (0). A purple banner at the top of the results section reads: "For COVID-19 related studies, please also see the Cochrane COVID-19 Study Register". Below the banner, the search results are listed, including the Cochrane Central Register of Controlled Trials, Issue 12 of 12, December 2020. There is a "Select all (28)" button and an "Export selected citation(s)" link.

| Year | Count |
|------|-------|
| 2020 | 2     |
| 2019 | 4     |
| 2018 | 0     |

| Category            | Count     |
|---------------------|-----------|
| Cochrane Reviews    | 0         |
| Cochrane Protocols  | 0         |
| <b>Trials</b>       | <b>28</b> |
| Editorials          | 0         |
| Special Collections | 0         |
| Clinical Answers    | 0         |

**28 Trials matching (cystectomy OR urinary deviation OR ileal conduit OR urostomy) in Title Abstract Keyword AND parastomal hernia OR hernia in Title Abstract Keyword - (Word variations have been searched)**

Cochrane Central Register of Controlled Trials  
Issue 12 of 12, December 2020

Select all (28) Export selected citation(s)

*Results: 0 reviews, 28 trials*

*Imported to Endnote: 28*

*After removal of duplicates: 26*

# Clinicaltrials.gov

18.12.2020

COVID-19 is an emerging, rapidly evolving situation.  
Get the latest public health information from CDC: <https://www.coronavirus.gov>.  
Get the latest research information from NIH: <https://www.nih.gov/coronavirus>.

NIH U.S. National Library of Medicine  
**ClinicalTrials.gov**  
Find Studies ▾ About Studies ▾ Submit Studies ▾ Resources ▾ About Site ▾ PRS Login

Home > Search Results

Modify Search Start Over

6 Studies found for: **cystectomy OR urinary diversion OR ileal conduit OR urostomy | parastomal hernia OR hernia**

Not enough studies found? Try these [search suggestions](#).

List By Topic On Map Search Details

Hide Filters Download Show/Hide

| Row | Saved                    | Status                                    | Study Title                                                                                                                                | Conditions                                                                              | Interventions                                                                                                                                                                                       | Locations                                                                                     |
|-----|--------------------------|-------------------------------------------|--------------------------------------------------------------------------------------------------------------------------------------------|-----------------------------------------------------------------------------------------|-----------------------------------------------------------------------------------------------------------------------------------------------------------------------------------------------------|-----------------------------------------------------------------------------------------------|
| 1   | <input type="checkbox"/> | Unknown                                   | <a href="#">Role of Mesh Stoma Reinforcement Technique (MSRT) in Prevention of Parastomal Hernia After Ileal Conduit Urinary Diversion</a> | <ul style="list-style-type: none"><li>Ileal Conduit</li><li>Parastomal Hernia</li></ul> | <ul style="list-style-type: none"><li>Procedure: Polypropylene Mesh Stoma reinforcement technique with ileal conduit urinary diversion</li><li>Procedure: ileal conduit urinary diversion</li></ul> | <ul style="list-style-type: none"><li>Urology and Nephrology, Mansoura, DK, Egypt</li></ul>   |
| 2   | <input type="checkbox"/> | Terminated<br><a href="#">Has Results</a> | <a href="#">Prevention of Parastomal Hernia by Mesh Placement</a>                                                                          | <ul style="list-style-type: none"><li>Parastomal Hernia</li></ul>                       | <ul style="list-style-type: none"><li>Device: Ethicon Physiamesh</li></ul>                                                                                                                          | <ul style="list-style-type: none"><li>University Of Miami, Miami, Florida, United S</li></ul> |
| 3   | <input type="checkbox"/> | Active, not recruiting                    | <a href="#">Post-operative Hernias After Radical Cystectomy</a>                                                                            | <ul style="list-style-type: none"><li>Evisceration, Traumatic</li></ul>                 | <ul style="list-style-type: none"><li>Procedure: Cystectomy</li></ul>                                                                                                                               | <ul style="list-style-type: none"><li>Uhmontpellier, Montpellier, France</li></ul>            |

**Filters**  
Apply Clear

**Status**

**Recruitment**

- Not yet recruiting
- Recruiting
- Enrolling by invitation
- Active, not recruiting

Results: 6 trials

Imported to Endnote: 6

After removal of duplications: 6

### **Additional sources:**

- European hernia society: Antoniou SA, Agresta F, Garcia Alamino JM et al (2018) European Hernia Society guidelines on prevention and treatment of parastomal hernias. *Hernia* 22:183–198.
- European hernia society: Congres abstracts 2019 & 2020: 2 abstract with subgroups -> sent e-mails: no additional data available
  - o Laparoscopic treatment of parastomal hernias: a single center experience with the Pauli procedure M. Borshchigov, C. Gröger, e.a.
  - o Parastomal hernias: a more and more surgical challenge J. A. Martín
- American hernia society: Congres abstracts 2019 & 2020: 1 abstract -> sent e-mail: article will follow soon
  - o KEYHOLE VERSUS SUGARBAKER TECHNIQUES IN PARASTOMAL HERNIA REPAIR AT BRICKER CONDUIT: A RETROSPECTIVE NATIONWIDE COHORT STUDY WITH LONG-TERM FOLLOW-UP Elisa Mäkäräinen-Uhlbäck, MD ; Jaana Vironen, MD, PhD
- Systematic reviews:
  - o Narang SK, Alam NN, Campain NJ, Pathak S, McGrath JS, Daniels IR, et al. Parastomal hernia following cystectomy and ileal conduit urinary diversion: a systematic review. *Hernia*. 2017;21(2):163-75.
  - o DeAsis FJ, Lapin B, Gitelis ME, Ujiki MB (2015) Current state of laparoscopic parastomal hernia repair: a meta-analysis. *World J Gastroenterol* 21:8670–8677
  - o Hansson BME, Slater NJ, Van der Velden AS, et al. Surgical techniques for parastomal hernia repair: a systematic review of the literature. *Ann Surg*. 2012;255(4):685–95.
  - o Aquina CT, Iannuzzi JC, Probst CP, Kelly KN, Noyes K, Fleming FJ, Monson JR. Parastomal hernia: a growing problem with new solutions. *Dig Surg*. 2014;31(4-5):366-76. doi: 10.1159/000369279. Epub 2014 Dec 13. PMID: 25531238.

**Screening by title:**

Results in Endnote: 881

After removal of duplicates: 571+7 added based on references +3 from congress abstracts

After Screening by title: 130



**Screening by abstract:**

Results in Endnote: 127 (+3 conference abstracts)

After screening by abstract: 42 (+3 conference abstracts)

| Author         | Inclusion         | Reason for exclusion                                                                               | References checked |
|----------------|-------------------|----------------------------------------------------------------------------------------------------|--------------------|
| Abaza 2015     | No after abstract | Inadequate study design                                                                            | N/A                |
| Abdallah 2009  | No after abstract | Not matching inclusion criteria                                                                    | N/A                |
| Aldaahm 2019   | Yes               | Robot-assisted repair, 7 cases: conference abstract                                                | None               |
| Amimi 2015     | No after abstract | Not matching inclusion criteria                                                                    | N/A                |
| Ando 2020      | No after abstract | Insufficient patient number                                                                        | N/A                |
| Antor 2017     | Yes               | Laparoscopic repair, 9 cases: conference abstract                                                  | None               |
| Avallone 2018  | No after abstract | Not matching inclusion criteria                                                                    | N/A                |
| Ayuso 2020     | Yes               | Robot-assisted repair, 5 cases urostomy -                                                          | DeAsis 2015        |
| Berger 2007    | Yes               | Laparoscopic repair, 66 patients; subgroup?                                                        | None               |
| Berrevoet 2018 | No after abstract | Insufficient patient number                                                                        | N/A                |
| Bos 1996       | Yes               | Not available?                                                                                     | None               |
| Bosanquet 2015 | No after abstract | Inadequate study design                                                                            | N/A                |
| Castillo 2006  | No after abstract | Not matching inclusion criteria                                                                    | N/A                |
| Craft 2008     | Yes               | Laparoscopic repair, 9 cases -> subgroup, older article, mixed techniques (keyhole and sugarbaker) | Steele 2003        |
| Davis 2012     | Yes               | Laparoscopic repair, 11 cases; conference abstract, technique not specified                        | None               |
| De Robles 2020 | Yes               | Mesh repair vs relocation, 16 cases (subgroup); both techniques combined in results                | None               |
| Deol 2003      | No after abstract | Inadequate study design                                                                            | N/A                |
| Doddamani 2015 | No after abstract | Not matching inclusion criteria                                                                    | N/A                |
| Donahue 2016   | No after abstract | Not matching inclusion criteria                                                                    | N/A                |
| Dunet 2002     | No after abstract | Inadequate study design                                                                            | N/A                |
| Elkarta 2020   | No after abstract | Not matching inclusion criteria                                                                    | N/A                |
| Faba 2009      | Yes               | Conference abstract, different techniques, 28 cases                                                | None               |
| Faba 2011      | Yes               | Open repair, 19 cases                                                                              | None               |
| Farnham 2004   | No after abstract | Not matching inclusion criteria                                                                    | N/A                |

|                  |                   |                                                             |             |
|------------------|-------------------|-------------------------------------------------------------|-------------|
| Fei 2011         | No after abstract | Insufficient patient number                                 | N/A         |
| Fischer 2017     | Yes               | 3 mesh repair, 9 cases (subgroup?)                          | None        |
| Fitzgerald 2017  | Yes               | Top hat repair, 22 cases                                    | Smarts 2011 |
| Franks 2001      | Yes               | Keyhole technique, 6 cases                                  | None        |
| Gadissa 2010     | No after abstract | Inadequate study design                                     | N/A         |
| Ganga 2017       | No after abstract | Inadequate study design                                     | N/A         |
| Garcia Rojo 2016 | No after abstract | Inadequate study design                                     | N/A         |
| Gilbert 2013     | No after abstract | Not matching inclusion criteria                             | N/A         |
| Gosselink 2015   | No after abstract | Inadequate study design                                     | N/A         |
| Gould 2003       | No after abstract | Inadequate study design                                     | N/A         |
| Gupta 2020       | Yes               | Robotic sugarbaker repair, 5 cases                          | None        |
| Hansson 2013     | No after abstract | Insufficient patient numbers                                | N/A         |
| Helal 1997       | Yes               | Mesh repair, 19 cases                                       |             |
| Hetet 2005       | No after abstract | Not matching inclusion criteria                             | N/A         |
| Ho 2004          | Yes               | Lateral approach repair, 15 cases                           | None        |
| Holmes 2002      | No after abstract | Not matching inclusion criteria                             | N/A         |
| Hopkins 1982     | No after abstract | Inadequate study design                                     | N/A         |
| Husain 2008      | No after abstract | Inadequate study design                                     | N/A         |
| Hussein 2017     | Yes               | Robot vs open, 6 cases                                      | None        |
| Hussein 2016     | No after abstract | Not matching inclusion criteria                             | N/A         |
| Jaipura 2020     | Yes               | Robotic sugarbaker repair, 6 cases; conference abstract     | None        |
| Jeekel 2017      | Yes               | Conservatively vs surgery, 6 cases (subgroup)               | None        |
| Kasperk 2000     | No after abstract | Not matching inclusion criteria                             | N/A         |
| Kaufman 1983     | No after abstract | Insufficient patient numbers                                | N/A         |
| Khanna 2012      | No after abstract | Not matching inclusion criteria                             | N/A         |
| Knap 2004        | No after abstract | Not matching inclusion criteria                             | N/A         |
| Kotes 2018       | Yes               | Open with mesh, 23 patients; subgroup + conference abstract | None        |

|                 |                   |                                                                  |           |
|-----------------|-------------------|------------------------------------------------------------------|-----------|
| Kouba 2007      | No after abstract | Not matching inclusion criteria                                  | N/A       |
| Kozlowski 2001  | No after abstract | Insufficient patient numbers                                     | N/A       |
| Kroese 2018     | Yes               | Conservative vs surgery (subgroup?)                              | None      |
| Lambrichts 2017 | Yes               | Conference abstract; conservative vs surgery, 8 cases (subgroup) | None      |
| Lampel 2012     | Yes               | Intraperitoneal slit mesh (new kind of mesh), ? cases            | None      |
| LeBlanc 2005    | No after abstract | Insufficient patient numbers                                     | N/A       |
| Lee 2018        | No after abstract | Inadequate study design                                          | N/A       |
| Li 2019         | No after abstract | Not matching inclusion criteria                                  | N/A       |
| Liard 2001      | No after abstract | Not matching inclusion criteria                                  | N/A       |
| Lima 2010       | No after abstract | Inadequate study design                                          | N/A       |
| Madaa 2014      | No after abstract | Not matching inclusion criteria                                  | N/A       |
| Majumder 2016   | No after abstract | Insufficient patient numbers                                     | N/A       |
| Mäkelä 1997     | No after abstract | Not matching inclusion criteria                                  | N/A       |
| Malak 2017      | No after abstract | Inadequate study design                                          | N/A       |
| Marshall 1975   | Yes               | Translocation?                                                   | None      |
| McAllister 2018 | No after abstract | Inadequate study design                                          | N/A       |
| McLemore 2007   | Yes               | Conventional vs laparoscopic, 19 cases (subgroup?)               | Deol 2008 |
| Mekhail 2017    | No after abstract | Insufficient patient numbers                                     | N/A       |
| Mekhail 2017    | No after abstract | Inadequate study design                                          | N/A       |
| Miller 2016     | Yes               | Retromuscular repair, 19 cases, conference abstract              | None      |
| Mirza 2008      | No after abstract | Insufficient patient numbers                                     | N/A       |
| Mitchell 2011   | No after abstract | Insufficient patient numbers                                     | N/A       |
| Mizrahi 2011    | No after abstract | Insufficient patient numbers                                     | N/A       |
| Mizrahi 2012    | No after abstract | Insufficient patient numbers                                     | N/A       |
| Movassaghi 2016 | No after abstract | Not matching inclusion criteria                                  | N/A       |
| Myers 2016      | No after abstract | Inadequate study design                                          | N/A       |

|                  |                   |                                                   |            |
|------------------|-------------------|---------------------------------------------------|------------|
| Nomura 2003      | No after abstract | Inadequate study design                           | N/A        |
| Olmi 2019        | Yes               | Keyhole repair, 7 cases (subgroup?)               | None       |
| Oma 2017         | No after abstract | Not matching inclusion criteria                   | N/A        |
| Palanivelu 2017  | No after abstract | Insufficient patient numbers                      | N/A        |
| Pfister 2020     | No after abstract | Not matching inclusion criteria                   | N/A        |
| Raigani 2014     | Yes               | Relocation/mesh repair, 10 cases (subgroup?)      | Rosen 2010 |
| Rajapandian 2020 | Yes               | Laparoscopic keyhole repair, subgroup?            | None       |
| Ramalingam 2013  | No after abstract | Inadequate study design                           | N/A        |
| Ramalingam 2014  | No after abstract | Inadequate study design                           | N/A        |
| Rege 2019        | No after abstract | Insufficient patient numbers                      | N/A        |
| Rezaee 2020      | No after abstract | Not matching inclusion criteria                   | N/A        |
| Rodriguez 2009   | No after abstract | Duplication                                       | N/A        |
| Rodriguez 2011   | No after abstract | Duplication                                       | N/A        |
| Roghmann 2015    | No after abstract | Not matching inclusion criteria                   | N/A        |
| Romo 2015        | No after abstract | Inadequate study design                           | N/A        |
| Rosen 2010       | No after abstract | Not matching inclusion criteria                   | N/A        |
| Safadi 2004      | Yes               | Laparoscopic repair, 5 cases (subgroup?)          | None       |
| Sanseverino 2002 | Yes               | New technique, ? cases                            | None       |
| Sanseverino 2002 | No after abstract | Duplication                                       | N/A        |
| Shakir 2020      | Yes               | Robotic mesh repair, 7 cases; conference abstract | None       |
| Sharma ?         | Yes               | Repair in general, 23 cases; conference abstract  | None       |
| Simeone 2003     | No after abstract | Not matching inclusion criteria                   | N/A        |
| Singh 2020       | No after abstract | Inadequate study design                           | N/A        |
| Smart 2011       | No after abstract | Not matching inclusion criteria                   | N/A        |
| Steele 2003      | No after abstract | Not matching inclusion criteria                   | N/A        |
| Su 2020          | No after abstract | Not matching inclusion criteria                   | N/A        |
| Sunaoshi 2003    | No after abstract | Inadequate study design                           | N/A        |

|                    |                   |                                                                   |              |
|--------------------|-------------------|-------------------------------------------------------------------|--------------|
| Suwa 2016          | No after abstract | Insufficient patient numbers                                      | N/A          |
| Syan 2012          | No after abstract | Not matching inclusion criteria                                   | N/A          |
| Talab 2018         | No after abstract | Inadequate study design                                           | N/A          |
| Tan 2017           | No after abstract | Inadequate study design                                           | N/A          |
| Tatay 2017         | Yes               | New technique, 6 cases (subgroup?)                                | None         |
| Trunbull 2003      | No after abstract | Inadequate study design                                           | N/A          |
| Tully 2017         | Yes               | Open repair, 27-40 cases; conference abstract                     | None         |
| Tully 2019         | Yes               | Open repair, 27-40 cases                                          | Duplication? |
| Van Ginkel 2019    | No after abstract | Not matching inclusion criteria                                   | N/A          |
| Velazco 2016       | Yes               | Different techniques, 16 cases (subgroup?)                        | None         |
| Von Bodman 2012    | Yes               | Mesh repair, 13 cases                                             | None         |
| Von Rundstedt 2014 | No after abstract | Insufficient patient numbers                                      | N/A          |
| Wara 2016          | No after abstract | Not matching inclusion criteria                                   | N/A          |
| Warren 2015        | Yes               | Retromuscular repair, 6 patients (subgroup?); conference abstract | None         |
| Wood 2004          | No after abstract | Not matching inclusion criteria                                   | N/A          |
| Yang 2017          | No after abstract | Inadequate study design                                           | N/A          |
| Ypsilantis 2015    | Yes               | Sugarbaker repair, 15 cases (subgroup?)                           | None         |

### Screening by full text:

Results in Endnote: 42 (+ 3 conference abstracts)

After screening by full text: 6 (+conference abstracts/subgroup analyses)

(1) **Author:** Aldhaam NA, Elsayed AS 2019

**Title:** Minimally invasive management of robot-assisted radical cystectomy related complications: 15 years of experience

**Journal:** Journal of Endurology, *Conference abstract:* 37<sup>th</sup> World Congress of Endurology, Abu Dhabi

**Patients:** patients undergoing robot-assisted repair of cystectomy complications; *subgroup* of 7 patients with parastomal hernia

**Intervention:** Robot-assisted repair of any kind of complication requiring surgical repair after radical cystectomy

**Clinical outcome:** Need of surgical repair

E-mailed, no response.

EXCLUSION: conference abstract + subgroup: no additional/specific data available  
(not matching inclusion criteria)

(2) **Author:** Antor M, Schwarz L 2017

**Title:** Laparoscopic repair of parastomal hernia after radical cystectomy

**Journal:** *Hernia*; *conference abstract*: 39th Annual International Congress of the European Hernia Society, Prevention and Prophylaxis beyond Hernia Surgery. Austria

**Patients:** 9 patients undergoing laparoscopic repair for symptomatic parastomal hernia of ileal conduit

**Intervention:** Laparoscopic repair of urostomy incisional hernia; technique not specified; no complications occurred.

**Clinical outcome:** postoperative complications short-term and long-term, hospital stay operation time, recurrence

E-mail not available.

EXCLUSION: conference abstract; no additional data available  
(not matching inclusion criteria)

(3) **Author:** Ayuso SA, Shao, JM 2020

**Title:** Robotic sugarbaker parastomal hernia repair: technique and outcomes

**Journal:** *Hernia*

**Patients:** patients requiring surgical repair for parastomal hernia, *subgroup* of 5 urostomy patients

**Intervention:** Robotic sugarbaker repair of parastomal hernia's;

**Clinical outcome:** operative time, intra-operative complications, length of stay, postoperative complications, and recurrence

E-mailed, no response

EXCLUSION: subgroup; no specific data available  
(not matching inclusion criteria)

(4) **Author:** Berger D, Bientzle M, 2007

**Title:** Laparoscopic repair of parastomal hernias: a single surgeon's experience in 66 patients

**Patients:** patients undergoing laparoscopic repair in a single center; 1 ileal conduit patient

**Intervention:** laparoscopic onlay mesh (sometimes 2 meshes)

**Clinical outcome:** recurrence

EXCLUSION: insufficient patient number

(5) **Author:** Bos SD

**Title:** Incidence and therapy of parastomal hernia in urology

**Journal:** *Nederlands Tijdschrift voor Geneeskunde*

EXCLUSION: review (inadequate study design)

(6) **Author:** Craft RO, Huguet KL 2008

**Title:** Laparoscopic parastomal hernia repair

**Journal:** Hernia

**Patients:** patients undergoing laparoscopic repair of parastomal hernias; *subgroup* of 9 patients with ileal conduit

**Intervention:** sugarbaker or keyhole laparoscopic parastomal hernia repair

**Clinical outcome:** operative time, intra-operative complications, length of stay, postoperative complications (not stated how fast after surgery), recurrence

E-mail, no response.

EXCLUSION: subgroup, no specific data available  
(not matching inclusion criteria)

(7) **Author:** Davis PJ, Klassen DR 2012

**Title:** Laparoscopic repair of parastomal hernias of ileal conduits

**Journal** Surgical Endoscopy and Other Interventional Techniques; *Conference abstract:* 2012 Scientific Session of the Society of American Gastrointestinal and Endoscopic Surgeons (SAGES)

**Patients:** patients undergoing attempted laparoscopic repair of a ileal conduit parastomal hernia

**Intervention:** laparoscopic parastomal hernia repair, technique not specified

**Outcome:** operative time, blood loss, length of stay, postoperative complications (none are described), recurrence

E-mail, dataset not available anymore.

EXCLUSION: conference abstract; no additional data available  
(not matching inclusion criteria)

(8) **Author:** De Robles MS, Young CJ 2020

**Title:** Parastomal hernia repair with onlay mesh remains a safe and effective approach

**Journal:** BMC Surg

**Patients:** patients undergoing relocation or mesh repair for symptomatic parastomal hernia, *subgroup* of 16 patients with ileal conduit

**Intervention:** either open relocation of mesh repair with peristomal or midline incision

**Outcome:** mesh related complications, recurrence, operative time, length of stay

E-mail, no response.

EXCLUSION: subgroup; no specific data available  
(not matching inclusion criteria)

(9) **Author:** Faba OR, Rosales, A 2011

**Title:** Simplified technique for parastomal hernia repair after radical cystectomy and ileal conduit creation

**Journal:** Urology

**Patients:** patients requiring surgical repair of ileal conduit parastomal hernia, 19 patients

**Intervention:** ipsilateral relocation of the stoma

**Outcome:** operative time, length of stay, postoperative complications, recurrence

INCLUSION

(10)**Author:** Faba OR, Rosales A, 2009

**Title:** Post-radical cystectomy parastomal hernia repair: long-term follow-up

**Journal:** European Urology Supplements; *conference abstract*: 24th Annual Congress of the European Association of Urology, Stockholm, Sweden

**Patients:** patients requiring surgical repair of ileal conduit parastomal hernia

**Intervention:** 19 patients ipsilateral relocation, 9 patients local fascia repair

**Outcome:** postoperative complications, operative time, recurrence

EXCLUSION: duplication (e-mail authors for 9 additional patients, no response)

(11)**Author:** Fischer I, Wundsam H, 2017

**Title:** Parastomal hernia repair with a 3D funnel intraperitoneal mesh device and same-sided stoma relocation: results of 56 cases

**Journal:** World journal of surgery

**Patients:** patients undergoing laparoscopic repair of parastomal hernia; *subgroup* with 7 ileal conduit patients

**Intervention:** Laparoscopic repair with mesh

**Outcome:** surgical complications, recurrence and treatment thereof

E-Mail, no response

EXCLUSION: subgroup; no specific data available

(not matching inclusion criteria)

(12)**Author:** Fitzgerald MJ, Ulrich S 2018

**Title:** Parastomal hernia repair using the "top hat" technique - An initial experience in 30 patients at Memorial Sloan Kettering Cancer Center

**Journal:** American Journal of Surgery

**Patients:** patients undergoing top-hat repair of a parastomal hernia; *subgroup* with 22 ileal conduit patients

**Intervention:** open top-hat repair of parastomal hernia

**Outcome:** operative time, postoperative complications, recurrence

E-Mail, no response.

EXCLUSION: subgroup, no specific data available

(not matching inclusion criteria)

(13)**Author:** Franks ME, Hrebinko RL, 2001

**Title:** Technique of parastomal hernia repair using synthetic mesh

**Journal:** Urology

**Patients:** 6 patients with ileal conduit parastomal hernia undergoing mesh repair

**Intervention:** suprapertitoneal fascial closure and mesh repair

**Outcome:** recurrence, 'no infections', 'no stenoses'

INCLUSION

(14)**Author:** Gupta S, Rawal S, 2020

**Title:** Robotic intraperitoneal onlay graft hernioplasty for ileal conduit urinary diversion associated parastomal hernia



**Journal:** Journal of Urology; *conference abstract:* 2020 Annual Meeting of the American Urological Association. United States.

**Patients:** patients requiring surgical repair of ileal conduit parastomal hernia

**Intervention:** robotic intraperitoneal mesh repair

**Outcome:** postoperative complications Clavien Dindo >2, operative time, length of stay

EXCLUSION: duplication (same as Jaipura 2020)

(15)**Author:** Helal M, Austin P, 1997

**Title:** Evaluation and management of parastomal hernia in association with continent urinary diversion

**Journal:** J Urol

**Patients:** 22 patients with symptomatic ileal conduit parastomal hernia

**Intervention:** transabdominal approach with closure of fascia and reposition of stoma

**Outcome:** recurrence, effect on pre-operative symptoms

INCLUSION

(16)**Author:** Ho KM, Fawcett DP 2004

**Title:** Parastomal hernia repair using the lateral approach

**Journal:** BJU Int

**Patients:** 15 patients with symptomatic ileal conduit associated parastomal hernia

**Intervention:** lateral approach, closure of the defect, covered with mesh

**Outcome:** recurrence

INCLUSION

(17)**Author:** Hussein A, Kozlowski J 2017

**Title:** Revisiting the abdomen after robot-assisted radical cystectomy: Tips and tricks for robot-assisted repair

**Journal:** Journal of urology; *conference abstract:* 112th Annual Meeting of the American Urological Association, AUA 2017. United States.

**Patients:** patients undergoing robotic/open repair of late post-operative radical cystectomy complications; *subgroup* of 4 vs 2 (robotic vs open) patients for ileal conduit parastomal hernia repair

**Intervention:** open vs robotic repair, not specified

**Outcome:** failure of treatment?

E-mail, no response

EXCLUSION: conference abstract + subgroup: no additional/specific data available (not matching inclusion criteria)

(18)**Author:** Hussein A, Hashmi Z 2016

**Title:** Reoperations following robot-assisted radical cystectomy: A decade of experience

**Journal:** Journal of urology

**Patients:** all patients undergoing surgical intervention after robotic assisted radical cystectomy, *subgroup* of only 4 patients with parastomal hernia

**Intervention:** robotic-assisted mesh hernioplasty

**Outcome:** postoperative complications, time to operation, predictive factors of need for surgical intervention, hospital stay, blood transfusion

EXCLUSION: insufficient patient number

(19)**Author:** Jaipura J, Rawal SK 2020

**Title:** Robotic modified sugarbaker intraperitoneal onlay graft hernioplasty for ileal conduit urinary diversion associated with parastomal hernia

**Journal:** European Urology Open Science; *Conference abstract:* Urology Open Science. Conference: EAU20 Virtual Congress and Theme Week

**Patients:** patients requiring surgical repair of ileal conduit parastomal hernia

**Intervention:** robotic intraperitoneal mesh repair

**Outcome:** postoperative complications Clavien Dindo >2, operative time, length of stay

E-Mail, no additional data available.

EXCLUSION: conference abstract; no additional data available.

(not matching inclusion criteria)

(20)**Author:** Jeekel J, Landin S 2017

**Title:** Surgical treatment versus watchful waiting in patients with parastomal hernia: A retrospective cohort study

**Journal:** Hernia; conference abstract: 18th Annual Hernia Repair. Mexico.

**Patients:** patients with parastomal hernia with any kind of stoma; 6 ileal conduit patients

**Intervention:** surgical treatment, versus watchful waiting

**Outcome:** symptoms, crossover rates, recurrence, postoperative complications, ER-admission

EXCLUSION: duplication (Lambrichts 2017 and Kroese 2018)

(21)**Author:** Kotes S, Greenwell T 2018

**Title:** Is obstruction of ileal conduit after parastomal hernia repair with porcine derived tissue matrix Stratice TM a valid concern?

**Journal:** Journal of Clinical Urology; *conference abstract:* 2018 Annual Scientific Meeting of the British Association of Urological Surgeons, BAUS 2018. United Kingdom

**Patients:** patients with incisional or parastomal hernia after ileal conduit, *subgroup* of 23 patients with ileal conduit parastomal hernia

**Intervention:** open repair with lateral mesh fixation

**Outcome:** mesh-related complications, stoma related complications (obstruction), recurrence

E-mail, no response

EXCLUSION: conference abstract + subgroup: no additional/specific data available (not matching inclusion criteria)

(22)**Author:** Kroese LF, Lambrichts DPV, 2018

**Title:** Non-operative treatment as a strategy for patients with parastomal hernia: a multicentre, retrospective cohort study

**Journal:** Colorectal Dis

**Patients:** patient with parastomal hernia with any kind of stoma; just 4 ileal conduit patients within the surgery treatment group

**Intervention:** surgical treatment, versus watchful waiting

**Outcome:** symptoms, crossover rates, recurrence, postoperative complications, ER-admission

E-Mail, no response

EXCLUSION: subgroup, no specific data available.  
(not matching inclusion criteria)

(23)**Author:** Lambrichts DPV, Kroese LF 2017

**Title:** Surgical treatment versus watchful waiting in patients with parastomal hernia: A retrospective cohort study

**Journal:** Hernia; conference abstract: 39th Annual International Congress of the European Hernia Society, Prevention and Prophylaxis beyond Hernia Surgery. Austria

**Patients:** patient with parastomal hernia with any kind of stoma; 8 ileal conduit patients

**Intervention:** surgical treatment, versus watchful waiting

**Outcome:** symptoms, crossover rates, recurrence, postoperative complications, ER-admission

EXCLUSION: duplication (Jeekel 2017 and Kroese 2018)

(24)**Author:** Lampel A, Runkel N 2012

**Title:** Correction of parastomal hernia using meshes

**Journal:** Urologe A

**Patients:** patients requiring surgical repair of parastomal hernia after ileal conduit, n=3

**Intervention:** open repair with sublay mesh placement

**Outcome:** recurrence

EXCLUSION: insufficient patient numbers

(25)**Author:** Marshall FF, Leadbetter WF 1975

EXCLUSION: not available online -> not matching inclusion criteria

(26)**Author:** McLemore EC, Harold KL, 2007

**Title:** Parastomal hernia: short-term outcome after laparoscopic and conventional repairs

**Journal:** Surg Innov;

**Patients:** all patients requiring parastomal hernia repair; *subgroup* of 17 ileal conduit patients

**Intervention:** open (primary suture, mesh, relocation) or laparoscopic (sugarbaker, keyhole) repair of any kind of symptomatic parastomal hernia

**Outcome:** postoperative complications, operative time, recurrence

EXCLUSION: duplication (subgroup), same as No 6

(27)**Author:** Miller HJ, Majumder A, 2016

**Title:** Retromuscular repair of parastomal hernias in the setting of ileal conduit: outcomes

and special considerations

**Journal:** Journal of the American college of surgeons; *conference abstract* 2nd Owen H Wangenstein Scientific Forum. United States

**Patients:** patients who underwent retromuscular repair of parastomal hernias of ileal conduit; 19 patients

**Intervention:** retromuscular repair with mesh

**Outcome:** postoperative complications, mesh related complications, recurrence

E-mail not available.

EXCLUSION: conference abstract; no additional data available  
(not matching inclusion criteria)

(28)**Author:** Olmi S, Oldani a 2019

**Title:** Laparoscopic modified keyhole technique with coated polyester mesh for treatment of parastomal hernia: measures for improving the outcome

**Journal:** J Laparoendosc Adv Surg Tech A

**Patients:** patients requiring surgical repair for parastomal hernia, *subgroup* of 9 ileal conduits

**Intervention:** keyhole technique with parietex or physiomesh

**Outcome:** postoperative complications, recurrence, mesh related complications

E-Mail, no response.

EXCLUSION: subgroup; no specific data available  
(not matching inclusion criteria)

(29)**Author:** Raigani S, Criss CN 2014

**Title:** Single-Center Experience With Parastomal Hernia Repair Using Retromuscular Mesh Placement

**Journal:** Journal of Gastrointestinal Journal

**Patients:** all patients requiring repair for parastomal hernia at a single center ; subgroup of 10 ileal conduit patients

**Intervention:** retromuscular approach utilizing a posterior component separation with relocation to contralateral abdominal wall

**Outcome:** postoperative wound complications, length of follow-up and hernia recurrence

E-Mail, no response

EXCLUSION: subgroup; no additional data available  
(not matching inclusion criteria)

(30)**Author:** Rajapandian S, Jankar SV, 2020

**Title:** Modified laparoscopic keyhole plus repair to manage a parastomal hernia: A single-center experience.

**Journal:** Asian J Endosc Surg

**Patients:** patients with symptomatic parastomal hernia requiring repair, 3 ileal conduits

**Intervention:** laparoscopic modified keyhole repair

**Outcome:** perioperative outcomes such as operative time, hospital stay, postoperative complications, recurrence

EXCLUSION: insufficient patient numbers

(31)**Author:** Safadi 2004

**Title:** Laparoscopic repair of parastomal hernia: early results

**Journal:** Surg Endosc

**Patients:** patients with symptomatic parastomal hernia of any stoma, 5 ileal conduit

**Intervention:** laparoscopic mesh repair

**Outcome:** postoperative complications, recurrence, operative time

INCLUSION: patient details are given for all 5 ileal conduit patients

(32)**Author:** Sanseverino RC, Zucco F

**Title:** Marlex or Prolene mesh repair of parastomal hernia in a patient with Bricker urinary diversion

**Patients:** 4 patients undergoing parastomal hernia repair

**Intervention:** semicircular incision around stoma with interposition of mesh

EXCLUSION: insufficient patient numbers

(33)**Author:** Shakir A, Ghoreifi A, 2020

**Title:** Feasibility, technique and perioperative outcomes of robotic parastomal hernia repair with biologic mesh after cystectomy and ileal conduit diversion

**Journal:** Journal of urology; *conference abstract:* 2020 Annual Meeting of the American Urological Association. United States.

**Patients:** 7 patients undergoing robotic repair for parastomal hernia after ileal conduit urinary diversion

**Intervention:** robotic keyhole repair

**Outcome:** postoperative 90-day complications, intraoperative complications, operative time

E-Mail, no additional data available.

EXCLUSION: conference abstract; no additional data available.

(not matching inclusion criteria)

(34)**Author:** Sharma DM, Mishra V 2009

**Title:** Long term outcome of parastomal hernia repair in patients treated for benign urological disease.

**Journal:** BJU International; *conference abstract:* British Association of Urological Surgeons 2009 Annual Scientific Meeting. Glasgow United Kingdom

**Patients:** undergoing repair for parastomal hernia after benign indication for urinary diversion; *subgroup* 20 ileal conduit patients, 3 continent urostoma

**Intervention:** parastomal hernia repair, not specified

**Outcome:** rate of complication, recurrence

E-Mail, no response

EXCLUSION: conference abstract + subgroup; no specific/additional data available

(not matching inclusion criteria)

(35) **Author:** Tatay F, Anoro M, 2016

**Title:** New technique for parastomal hernia repair: "IVO technique"

**Journal:** Hispanoamericana de Hernia; Spanish article

**Patients:** patients requiring parastomal hernia repair; *subgroup* of 9 ileal conduit patients

**Outcome:** feasibility?

E-mail not available.

EXCLUSION: subgroup, no specific data available.

(not matching inclusion criteria)

(36) **Author:** Tran H, Turingan I, 2014

**Title:** Single-port laparoscopic parastomal hernia repair with modified sugarbaker technique

**Journal:** Journal of the Society of Laparoendoscopic surgeons

**Patients:** patients requiring parastomal hernia repair, *subgroup* of 4 ileal conduit repairs

**Intervention:** modified sugarbaker repair

**Outcome:** recurrence, intraoperative complications, postoperative complications, length of stay

EXCLUSION: insufficient patient numbers

(37) **Author:** Tully K, Von Bodman C 2017

**Title:** Evaluation of a novel three-dimensional funnel mesh for parastomal hernia repair after ileal conduit diversion

**Journal:** Journal of Urology; *conference abstract:* 112th Annual Meeting of the American Urological Association, AUA 2017. United States

**Patients:** 40 patients with clinically significant hernia after ileal conduit

**Intervention:** reduction of hernia sac, followed by mesh placement

**Outcome:** postoperative complications, recurrence

EXCLUSION: duplication (Tully 2019)

(38) **Author:** Tully KH, Roghmann F 2019

**Title:** Parastomal hernia repair with 3-D Mesh implants after radical cystectomy and ileal conduit urinary diversion – A single center experience using a purpose made alloplastic mesh implant

**Journal:** Urology

**Patients:** 40 patients with clinically significant hernia after ileal conduit

**Intervention:** reduction of hernia sac, followed by mesh placement

**Outcome:** postoperative complications, recurrence

INCLUSION: 40 patients undergoing repair

(39) **Author:** Velzaco C, Garvey E, 2016

**Title:** Laparoscopic parastomal hernia repair: a single center updated review

**Journal:** Hernia; *conference abstract:* 17th Annual Hernia Repair. Washington, DC United States

**Patients:** patients undergoing laparoscopic parastomal hernia repair at a single center; *subgroup* of 16 ileal conduit repairs

**Intervention:** sugarbaker/keyhole/relocation

**Outcome:** postoperative complications, intraoperative outcomes, recurrence

EXCLUSION: duplication (+ subgroup), same as No 6

(40)**Author:** Von Bodmann C, Brock M, 2012

**Title:** Parastomal hernia repair following ileal conduit urinary diversion using a novel funnel mesh implant

**Journal:** Journal of Urology; *conference abstract:* 2012 Annual Meeting of the American Urological Association, AUA. Atlanta, GA United States.

**Patients:** 13 patients with parastomal hernia after ileal conduit

**Intervention:** novel mesh implant specifically designed with a central penetration point and funnel for intestinal parts aiming to minimize penetration; intraperitoneal sublay

**Outcome:** recurrence, postoperative complications

E-Mail, no additional data available.

EXCLUSION: conference abstract; no additional data available  
(not matching inclusion criteria)

(41) **Author:** Warren J, Grant A 2015

**Title:** Open retromuscular repair of parastomal hernias

**Journal:** Diseases of the colon and rectum; *conference abstract:* Annual Meeting of the American Society of Colon and Rectal Surgeons, ACSRS 2015. Boston

**Patients:** patients with symptomatic parastomal hernia; 11% (+7) ileal conduit

**Intervention:** retromuscular repair

**Outcome:** surgical site infection, surgical site occurrence, hernia recurrence

E-Mail, too few additional data available.

EXCLUSION: conference abstract + subgroup;  
(not matching inclusion criteria)

(42)**Author:** Ypsilantis E, George M, 2015

**Title:** Outcome of parastomal hernia repair with a modified sugarbaker technique

**Journal:** colorectal disease; *conference abstract:* 10th Scientific and Annual Meeting of the European Society of Coloproctology. Dublin Ireland.

**Patients:** patients requiring hernia repair at a tertiary center, *subgroup* of 15 ileal conduit patients

**Intervention:** modified sugarbaker technique

**Outcome:** postoperative morbidity, recurrence

E-Mail, no response

EXCLUSION: conference abstract + subgroup; no additional/specific data available  
(not matching inclusion criteria)

(43)41st Annual Congress of the European Hernia Society: Evidence, Innovation, Education;  
September 11–14, 2019—Hamburg, Germany:

**Author:** Martin, J. A.

**Title:** Parostomal hernias: a more and more surgical challenge

**Journal:** presented at the 41<sup>st</sup> Congress of the European Hernia Society

**Patients:** 60 patients who underwent surgery for parastomal hernia, *subgroup* of 12 ileal conduit patients

**Intervention:** eventroplasty with Dynamesh IPST implant, 3D-preshaped mesh

**Outcome:** recurrence, safety

E-mail, no additional data available.

EXCLUSION: conference abstract + subgroup; no additional/specific data available.  
(not matching inclusion criteria)

(44) 41st Annual Congress of the European Hernia Society: Evidence, Innovation, Education; September 11–14, 2019—Hamburg, Germany:

**Author:** Borshchigov, M., Gröger, C.

**Title:** Laparoscopic treatment of parastomal hernias: a single center experience with the Pauli procedure

**Patients:** patients requiring surgery for parastomal hernia, *subgroup* of 6 patients with urostomy

**Intervention:** laparoscopic Pauli procedure in 5 patients

**Outcome:** postoperative hospital stay and operative time, complications

E-Mail, no additional/specific data available

EXCLUSION: conference abstract + subgroup; no additional/specific data available.  
(not matching inclusion criteria)

(45) American Hernia Society Annual Meeting 2020:

**Author:** Mäkäräinen-Uhlbäck, E., Vironen, J.

**Title:** Keyhole versus Sugarbaker techniques in parastomal hernia repair at bricker conduit: a retrospective nationwide cohort study with long-term follow-up

**Patients:** patients requiring primary repair of a ileal conduit parastomal hernia, 34 patients

**Intervention:** Keyhole (n=25), Sugarbaker (n=6)

**Outcome:** primary outcome was parastomal hernia recurrence, secondary outcomes were complication and reoperation rate

E-Mail, full article will be published in near future

EXCLUSION: conference abstract, no additional data available  
(not matching inclusion criteria)
